# Supplementary material for: Cancer epithelia-derived mitochondrial DNA is a targetable initiator of a paracrine signaling loop that confers taxane resistance
Source: PubMed Central journal article supplement — Proc Natl Acad Sci U S A. 2020 Apr 1;117(15):8515–23. doi: 10.1073/pnas.1910952117 (PMC7165425; doi:10.1073/pnas.1910952117), 2020-04-01
Supplement: pnas.1910952117.sapp.pdf [file pnas.1910952117.sapp.pdf]

SI Appendix

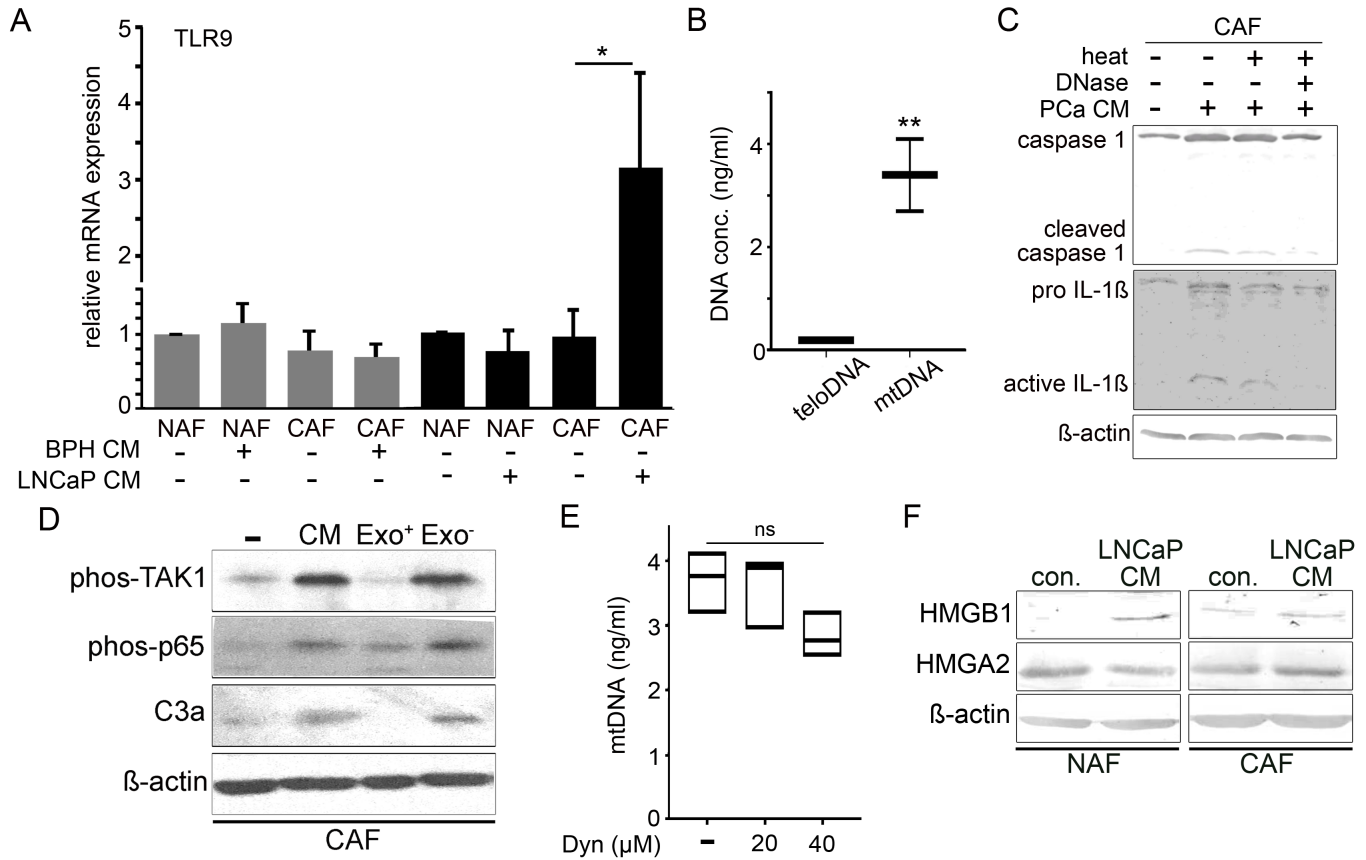

**Figure S1.** **A** Relative mRNA expression of TLR9 was measured in the presence and absence of BPH1 conditioned medium (CM) and LNCaP-CM in cultured NAF or CAF. **B** Measurement of telomere and mitochondrial DNA concentration from conditioned medium of cultured human prostate cancer cells. **C** Protein expression of caspase1 and IL-1 $\beta$  from cultured CAF treated with LNCaP-CM. Lower molecular weight cleaved-caspase1 and mature active-IL1 $\beta$  induced by LNCaP-CM was limited by DNase1 treatment and subsequent heat inactivation.  $\beta$ -actin expression was used as a loading control. **D** Western blot for phosphorylated TAK1, phosphorylated p65, and C3a from CAF cells cultured with RPMI (-), LNCaP-CM (CM), exosome enriched RPMI (Exo<sup>+</sup>), or exosome depleted LNCaP-CM (Exo<sup>-</sup>). **E** Inhibition of dynamin-mediated exosome secretion with increasing doses of dynasore had no effect on the secretion of mtDNA by LNCaP cells. **F** Protein expression of HMGB1 and HMGA2 by NAF and CAF was subjected to western blotting following LNCaP-CM treatment. \*P < 0.05, \*\*P < 0.01, \*\*\*P < 0.001.

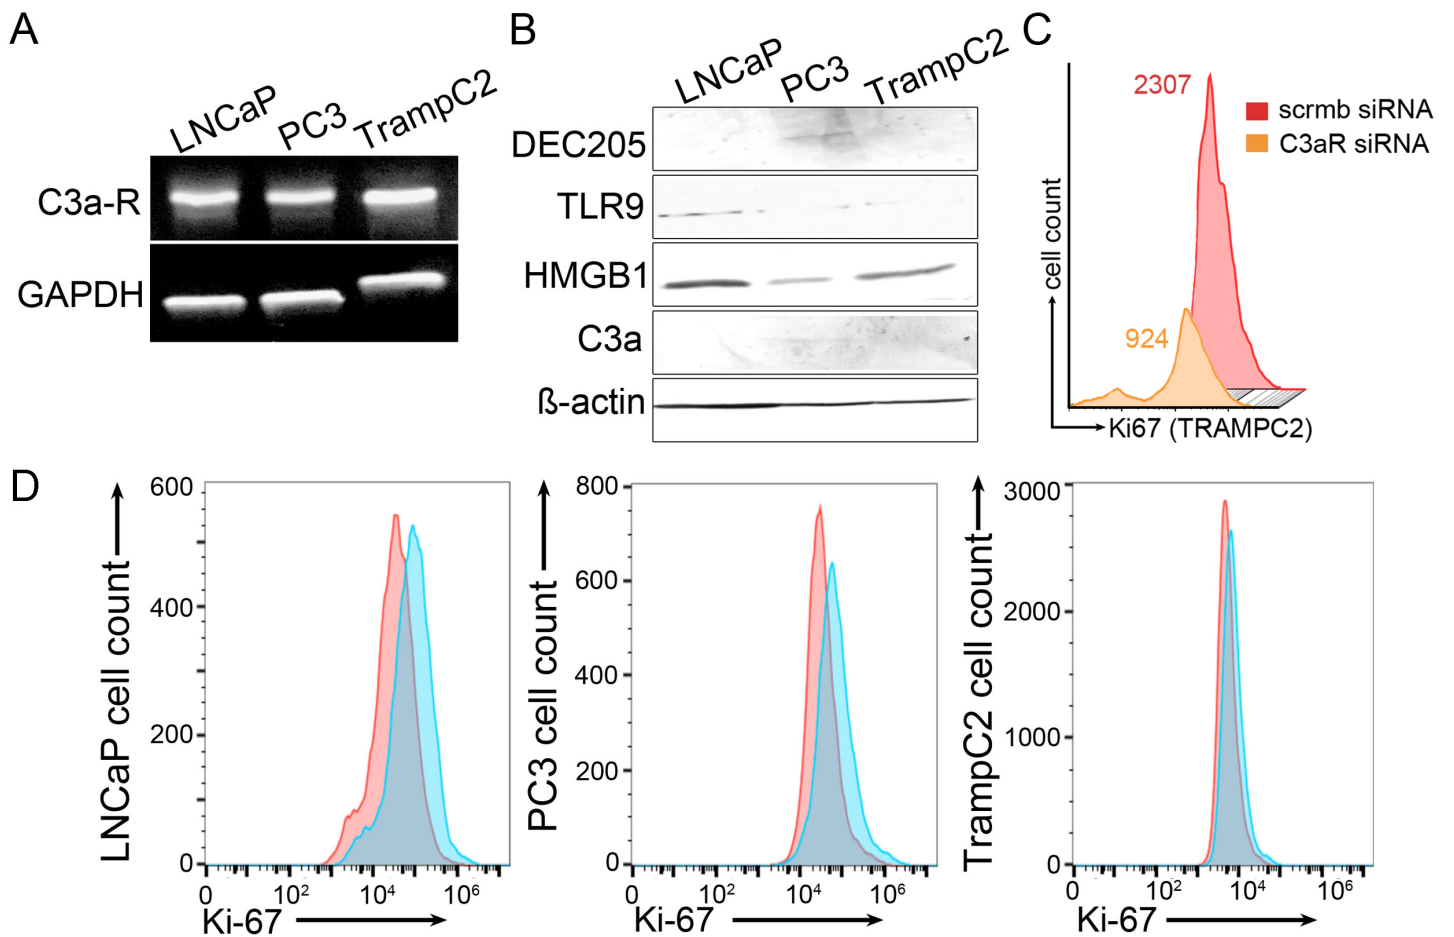

**Figure S2.** **A** C3a receptor (C3a-R) mRNA expression was similarly expressed by cultured LNCaP, PC3 and TrampC2 cells. **B** Western blot for the expression of DEC205, TLR9, HMGB1, and C3a was performed on the indicated PCa epithelial cell lines. **C** Scrambled or C3aR siRNA knockdown of TRAMP2 cells were exposed to CAF cells in a trans-well co-culture for 48 h. Ki67 of TRAMP2 was quantitated through FACS analysis. **D** Proliferation of LNCaP, PC3 and TrampC2 cells was quantitated by measuring Ki-67 through FACS analysis following treatment with C3aR agonist or scrambled peptides for 48 h, (n = 3).

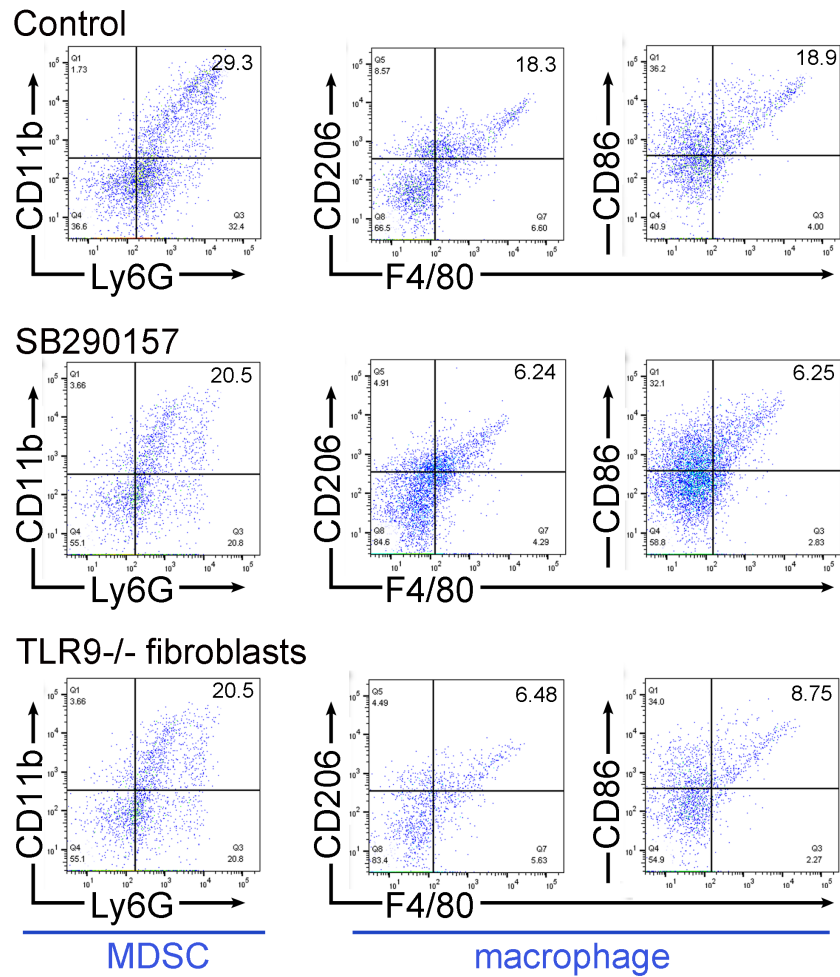

**Figure S3.** FACS analysis of the tumor draining lymph node from syngeneic mice with wild type prostatic fibroblasts or TLR9-knockout fibroblasts and TRAMPC2 epithelia (See Figure 3B). C3a antagonist (SB290157) and TLR9-knockout fibroblasts had similar reduction in the recruitment of myeloid derived cells (MDSC) and M2 macrophage activation, compared to control, saline treated mice harboring TRAMPC2/wild type prostatic fibroblasts tumors.

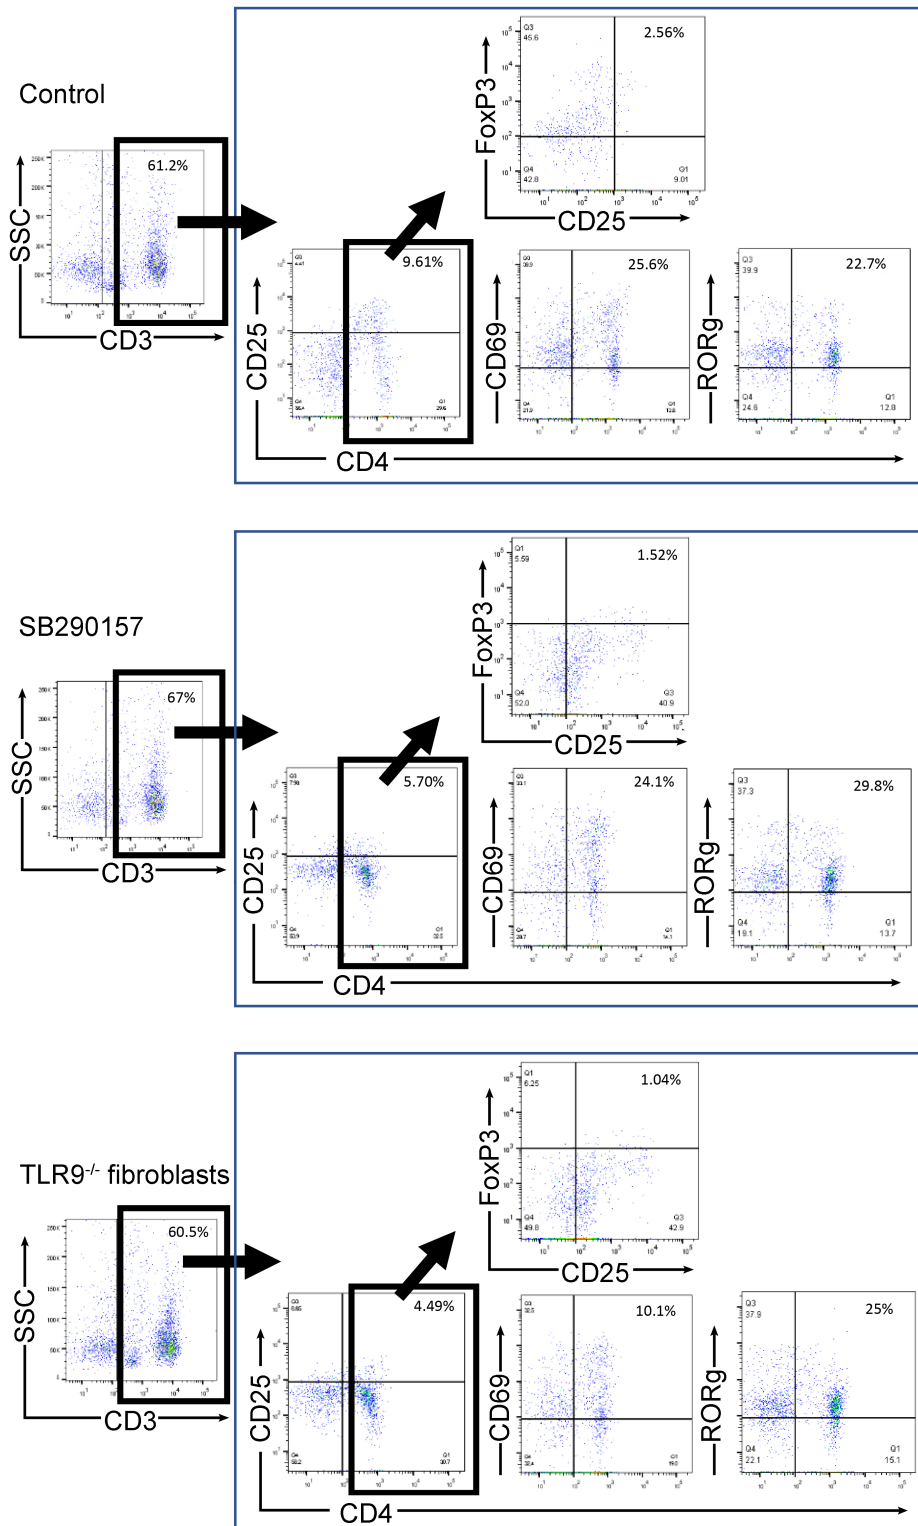

**Figure S4.** FACS analysis of the draining lymph node demonstrated C3a antagonist and TLR9-knockout fibroblasts had similar CD3<sup>+</sup> T cell infiltration, however the activation state of T helper cells, as determined by CD4<sup>+</sup>/CD69<sup>+</sup> and CD4<sup>+</sup>/CD25<sup>+</sup> expression differed significantly, compared to control. Th17 like cells (CD4<sup>+</sup>/RORγ<sup>+</sup>) followed the opposite pattern with an increase in their presence in the C3 antagonist and the TLR9<sup>-/-</sup> fibroblasts models. In parallel we observed a decrease in T<sub>reg</sub> (CD4<sup>+</sup>CD25<sup>+</sup>FoxP3<sup>+</sup>).

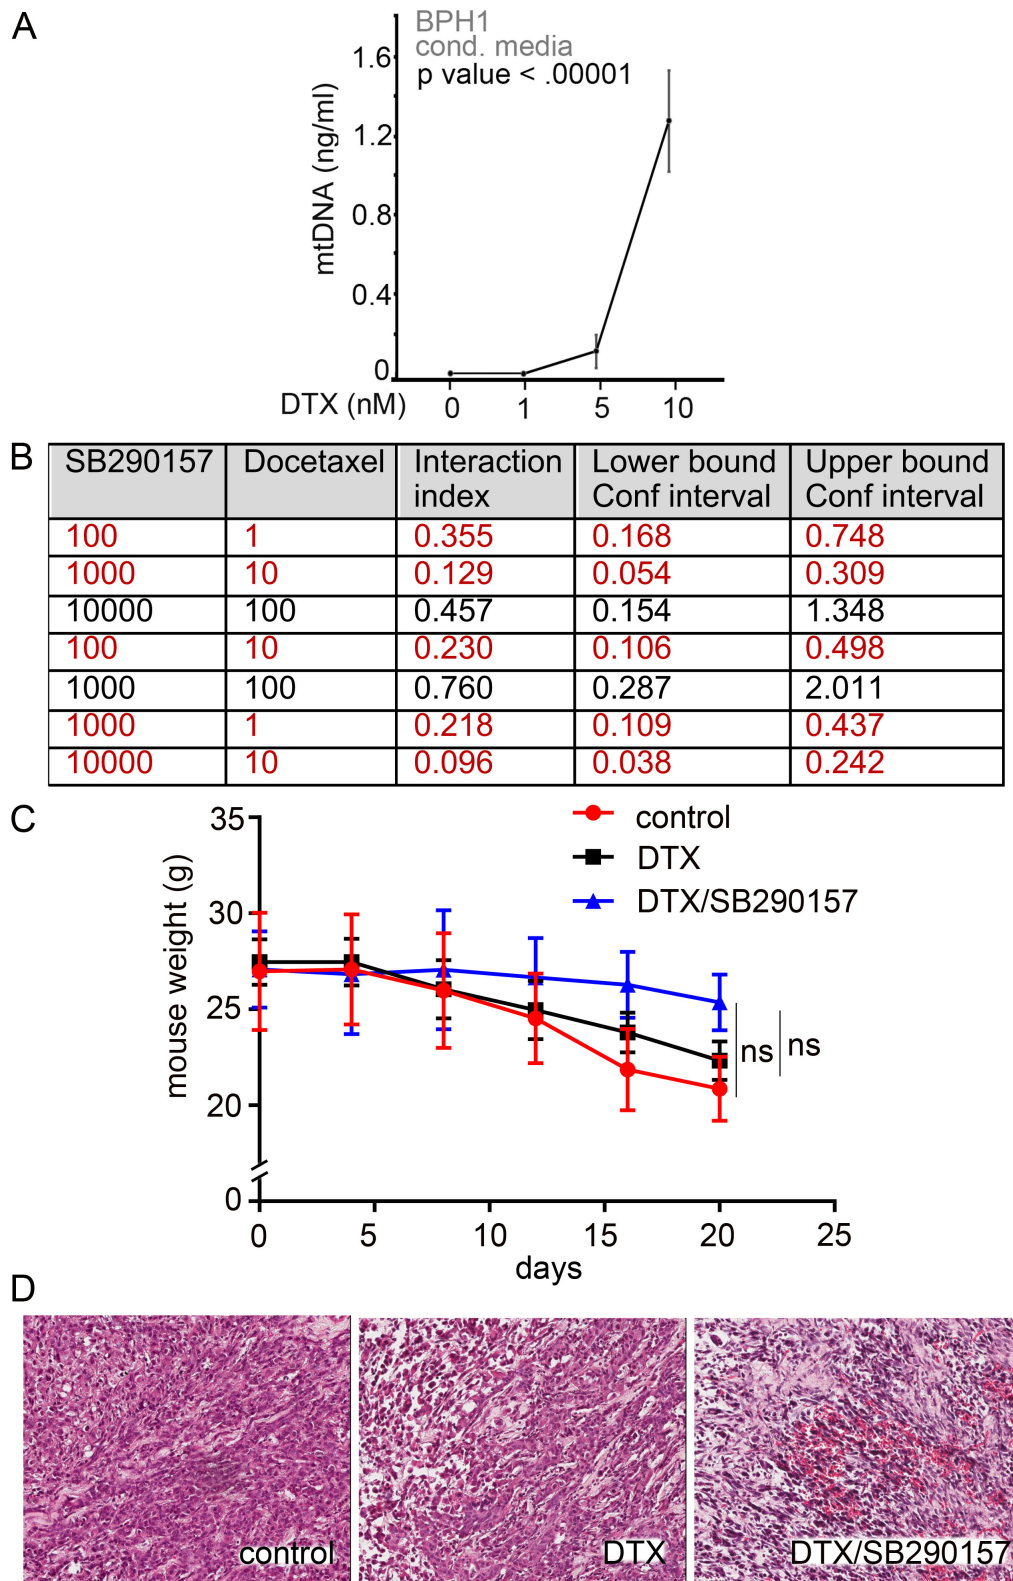

**Figure S5. A** MtDNA secreted by BPH1 cell line treated with docetaxel was elevated in a dose-dependent manner (n=3). Significance was determined by repeated measures ANOVA. **B** An interaction index and confidence intervals were calculated by Chou-Talalay method for determining a synergistic relationship between SB290157 and docetaxel treatment at the indicated treatment concentrations of PC3 cells by

the MTT viability assay. **C** Mice harboring subcutaneous xenografts of PC3/CAF tumors were weighed throughout the saline, docetaxel alone, or combination with SB290157 treatment course. Data represent the mean  $\pm$  S.D. among groups by one-way ANOVA (ns - not significant). **D** H&E images of resulting tumors from each treatment group of subcutaneous xenografted mice.
